# Supplementary material
Source: PubMed Central journal article supplement (PMC3454485)

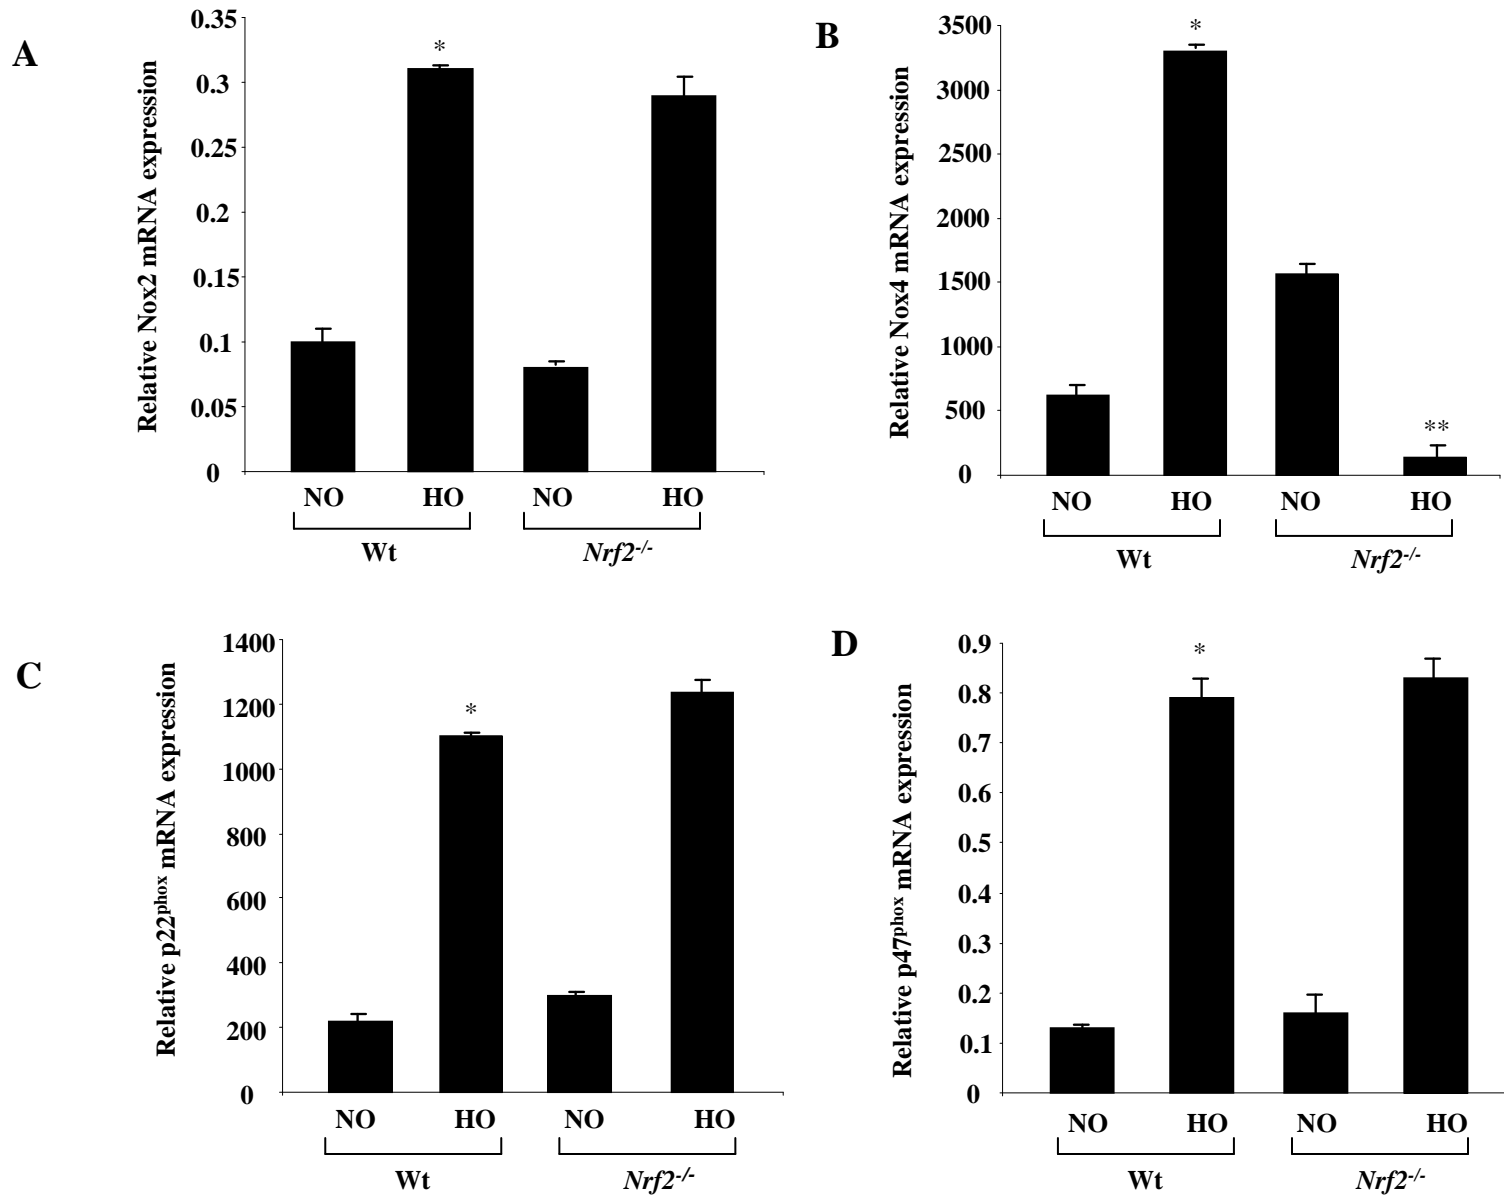

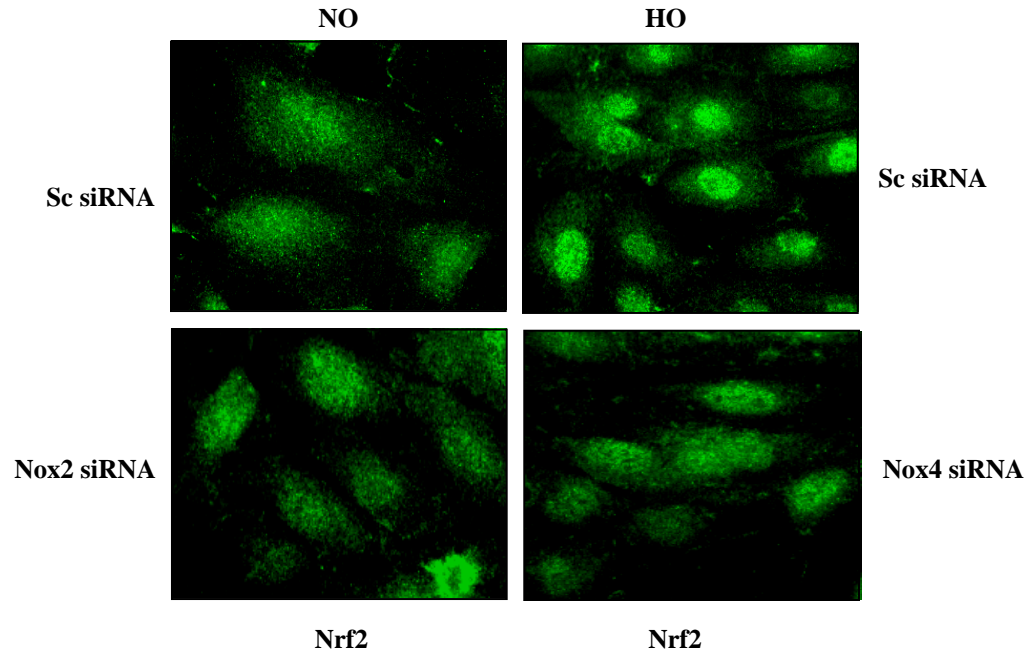

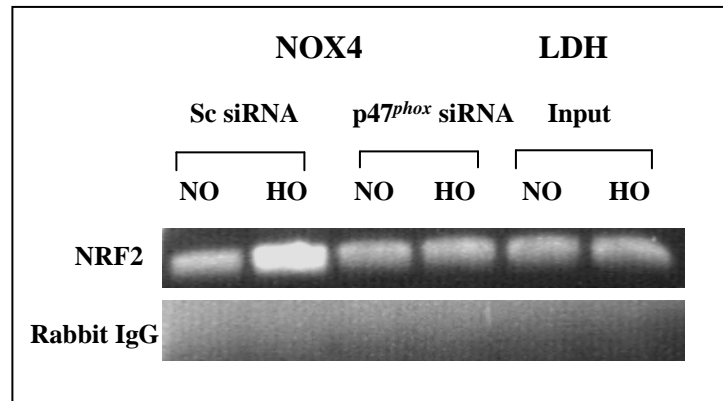

Supplement: NIHMS285366-supplement-01.pdf [file NIHMS285366-supplement-01.pdf]
